# Supplementary material
Source: HighWire-hosted journal article supplement (http://dmd.aspetjournals.org/highwire/filestream/66338/field_highwire_adjunct_files/0/Supplemental_Figure_1_54296.pdf)
Supplement: Supplemental_Figure_1_54296.pdf [file Supplemental_Figure_1_54296.pdf]

Selective inhibition of cytochrome P450 2D6 by sarpogrelate and its active metabolite, M-1, in human liver microsomes. Doo-yeoun Cho, Soo Hyeon Bae, Joeng Kee Lee, Yang Weon Kim, Bom-Taeck Kim, Soo Kyung Bae. *Drug Metabolism and Disposition*

**Supplemental Figure 1.**

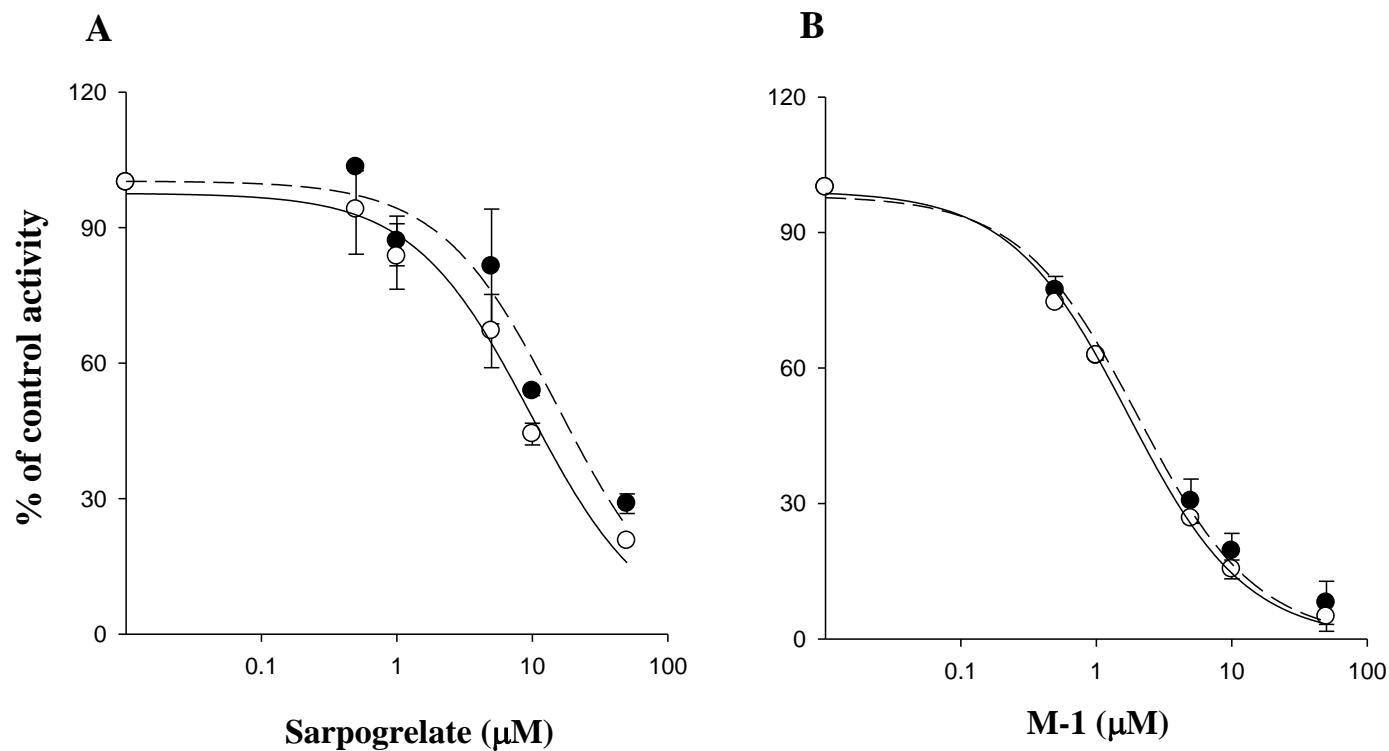

Supplemental Figure 1. Representative  $\text{IC}_{50}$  shift plots for CYP2D6 by sarpogrelate (A) and M-1 (B) with human liver microsomes in the presence (●, the dashed lines) and absence (○, the solid lines) of NADPH for 30 min pre-incubation. Data are the mean  $\pm$  SD of triplicate determinations. The dashed lines and solid lines represent the best fit to the data using non-linear regression.
